# Supplementary material for: Efficient adsorptive removal of potassium from potassium perrhenate solution using a cationic ion exchange resin
Source: Royal Society of Chemistry journal article supplement (doi:10.1039/d4ra08404g), 2025-01-01
Supplement: d4ra08404g1.pdf [file d4ra08404g1.pdf]

## Supplementary information

### Efficient adsorptive removal of potassium from potassium perrhenate solution by cationic ion exchange resin

Kunkun Chen <sup>1,2</sup>, Linbo Li <sup>1,\*</sup>, Kai Yang <sup>1</sup>, Qigao Cao <sup>2</sup>, Yunfei Chen <sup>2</sup>

1. School of Metallurgical Engineering, Xi'an University of Architecture and Technology, Xi'an 710055, China
2. Electronic Material Research Center, Northwest Institute for Nonferrous Metal Research, Xi'an 710016, China

**\*Corresponding author**

E-mail addresses: yj-lilinbo@xauat.edu.cn (L. Li)

## **Table of contents**

**Text S1.** Adsorption isotherm models

**Text S2.** Adsorption kinetic models

**Fig. S1.** The potassium adsorption efficiency of C160 and C160H

**Fig. S2.** Adsorption of potassium by resin according to various isotherm models: (a)-Langmuir; (b)-Freundlich; (c)-Temkin; (d)-Dubinin-Radushkevich

**Fig. S3.** SEM-EDS scanning results of C160H resin loaded with potassium: (a) SEM images, (b-f) EDS maps for elemental distribution, and (g) elemental composition spectrum

**Fig. S4.** SEM-EDS scanning results of C160H resin before adsorption: (a)SEM images,(b-f) EDS maps for elemental distribution, and (g) elemental composition spectrum

**Fig. S5.** Binding energy between  $H^+ / K^+$  and ligand

**Table S1.** Physical and chemical properties of Purolite C160 ion exchange resin

### Text S1. Adsorption isotherm models

Adsorption isotherm is used to describe the relationship between adsorption capacity and concentration of solution after adsorption equilibrium at a certain temperature. Adsorption isotherm is usually fitted by adsorption isotherm models. At present, there are four commonly used models include Langmuir model, Freundlich model, Temkin model and Dubinin–Radushkevich model<sup>1-3</sup>, as follows:

Langmuir model:

$$q_e = \frac{q_{\max} K_L C_e}{1 + K_L C_e} \quad (\text{S-1})$$

$$R_L = \frac{1}{1 + K_L C_0} \quad (\text{S-2})$$

Freundlich model:

$$q_e = K_F C_e^{1/n} \quad (\text{S-3})$$

Temkin model:

$$q_e = B_T \ln K_T + B_T \ln C_e \quad (\text{S-4})$$

$$B_T = RT / b \quad (\text{S-5})$$

Dubinin-Radushkevich model:

$$\ln q_e = \ln q_m - K_{DR} \varepsilon^2 \quad (\text{S-6})$$

$$\varepsilon = RT \ln\left(1 + \frac{1}{C_e}\right) \quad (\text{S-7})$$

$$E = \frac{1}{\sqrt{2K_{DR}}} \quad (\text{S-8})$$

Where  $C_e$ ,  $C_0$  are the equilibrium and initial concentration of the adsorbate in the solution ( $\text{mg}\cdot\text{L}^{-1}$ ), respectively,  $q_e$  is the adsorption capacity of adsorbent to adsorbate after adsorption equilibrium, ( $\text{mg}\cdot\text{g}^{-1}$ ),  $q_{\max}$  is maximum adsorption capacity of single molecular layer of adsorbent related to adsorption sites ( $\text{mg}\cdot\text{g}^{-1}$ ),  $n$  is Freundlich constant indicating the adsorption intensity,  $b$  represent the Temkin constant,  $q_m$  refers to theoretical isotherm saturation capacity ( $\text{mg}\cdot\text{g}^{-1}$ ),  $K_L$ ,  $K_F$ ,  $K_T$  and  $K_{DR}$  are the equilibrium constants of Langmuir, Freundlich, Temkin, and Dubinin-Radushkevich models, respectively,  $\varepsilon$  refers to the Polanyi potential constant ( $\text{J/mol}$ ), and  $E$  refers to energy per molecule of adsorbate ( $\text{kJ/mol}$ )

## Text S2. Adsorption kinetic models

Adsorption kinetics mainly describes the change of adsorption rate and the influence of external factors on the adsorption process. The models of Pseudo-first-order, Pseudo-second-order and Weber-Morris<sup>4,5</sup> are commonly used adsorption kinetic models, as follows:

$$\text{Pseudo-first-order equation: } q_t = q_e(1 - e^{-K_1 t}) \quad (\text{S-9})$$

$$\text{Pseudo-second-order equation: } \frac{t}{q_t} = \frac{1}{K_2 q_e^2} + \frac{t}{q_e} \quad (\text{S-10})$$

$$\text{Weber-Morris equation: } q_t = K_p t^{1/2} + C \quad (\text{S-11})$$

where  $K_1$  is the adsorption rate constant of the Pseudo-first-order model,  $\text{min}^{-1}$ ;  $K_2$  is the adsorption rate constant of the Pseudo-second-order model,  $\text{g} \cdot \text{mg}^{-1} \cdot \text{min}^{-1}$ ;  $K_p$  is the intra-particle diffusion rate constant,  $\text{mg} \cdot \text{g}^{-1} \cdot \text{min}^{-0.5}$ ;  $C$  is a constant, which is related to the thickness of boundary layer.

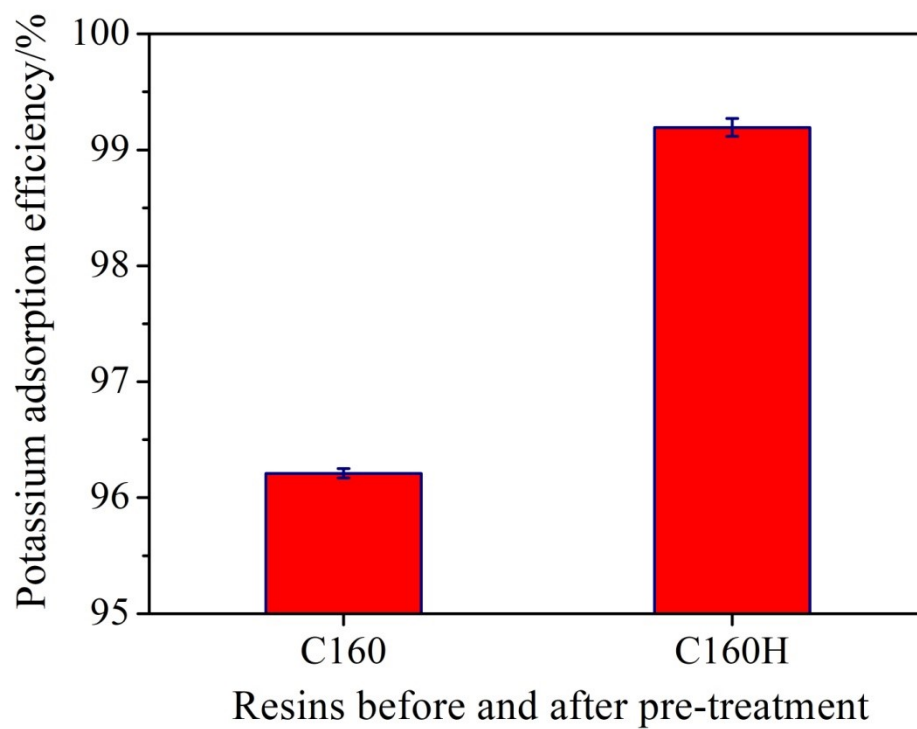

**Fig. S1** The potassium adsorption efficiency of C160 and C160H  
(KReO<sub>4</sub> solution concentration of 2 g·L<sup>-1</sup>, solid-to- liquid ratio of 1:20, rotating speed of 180 rpm,  
temperature of 25°C, contact time of 6h)

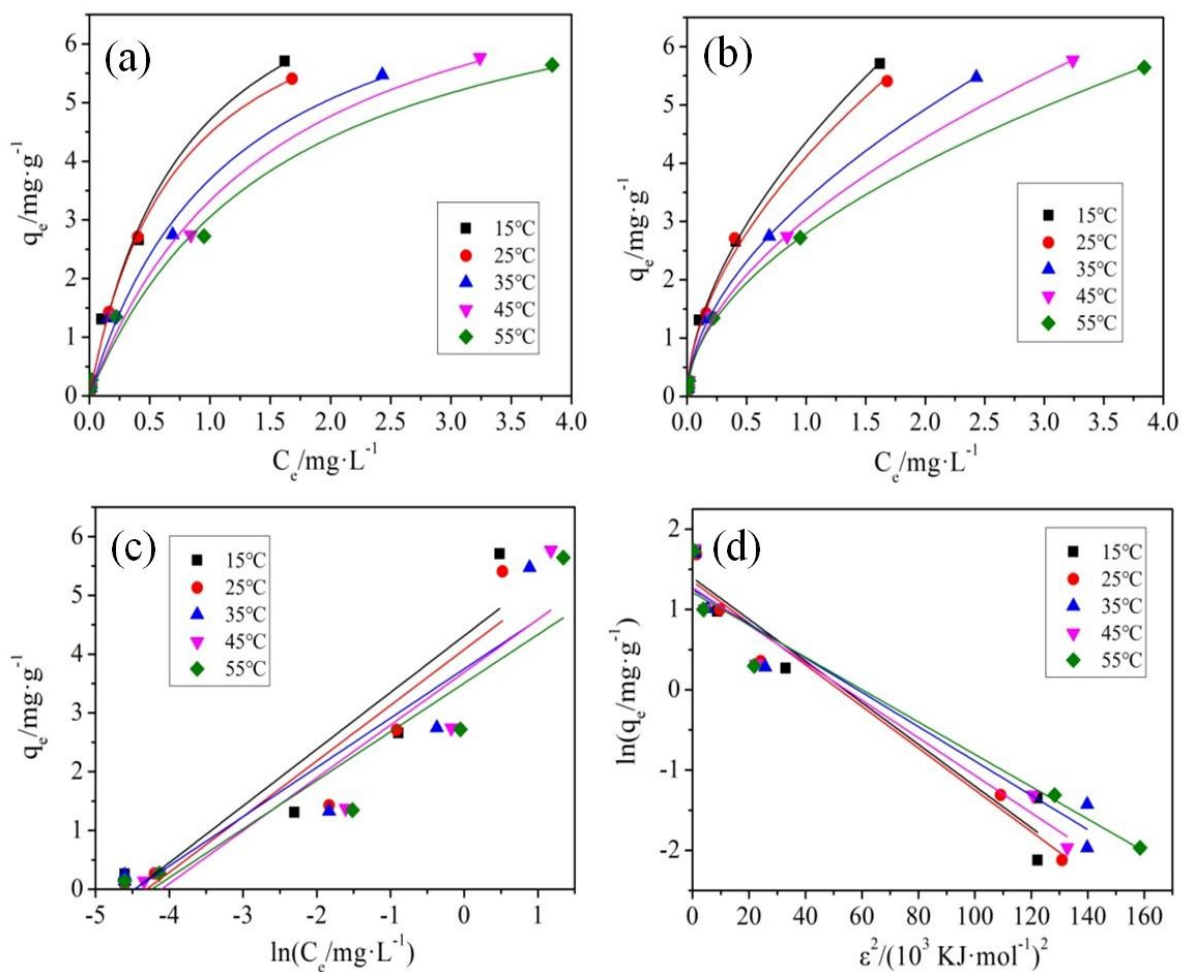

**Fig. S2** Adsorption of potassium by resin according to various isotherm models: (a)-Langmuir; (b)-Freundlich; (c)-Temkin; (d)-Dubinin-Radushkevich

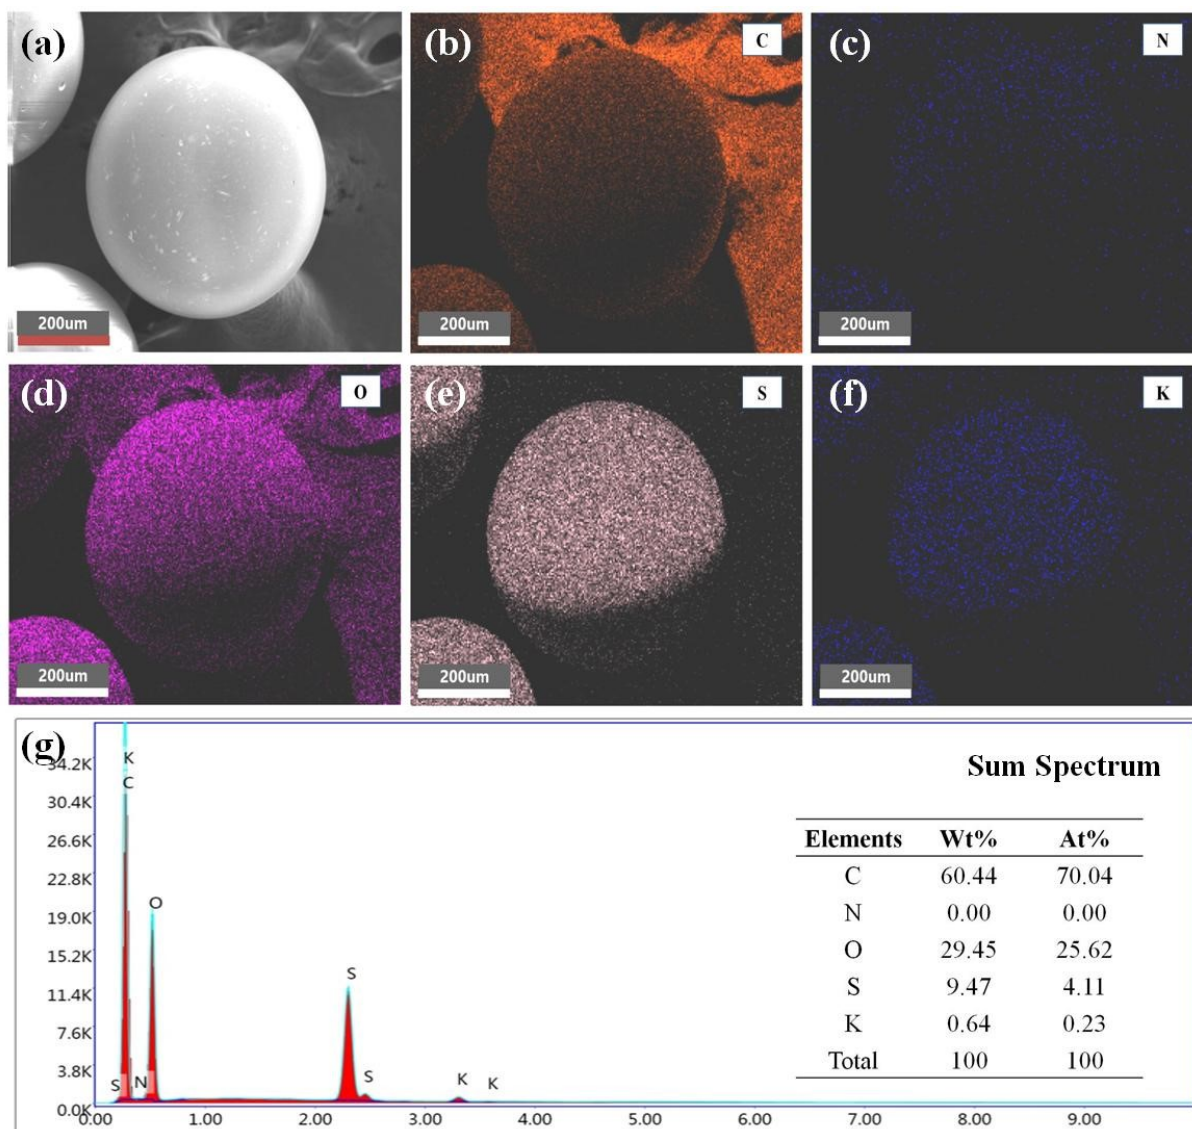

**Fig. S3** SEM-EDS scanning results of C160H resin loaded with potassium: (a) SEM images, (b-f) EDS maps for elemental distribution, and (g) elemental composition spectrum

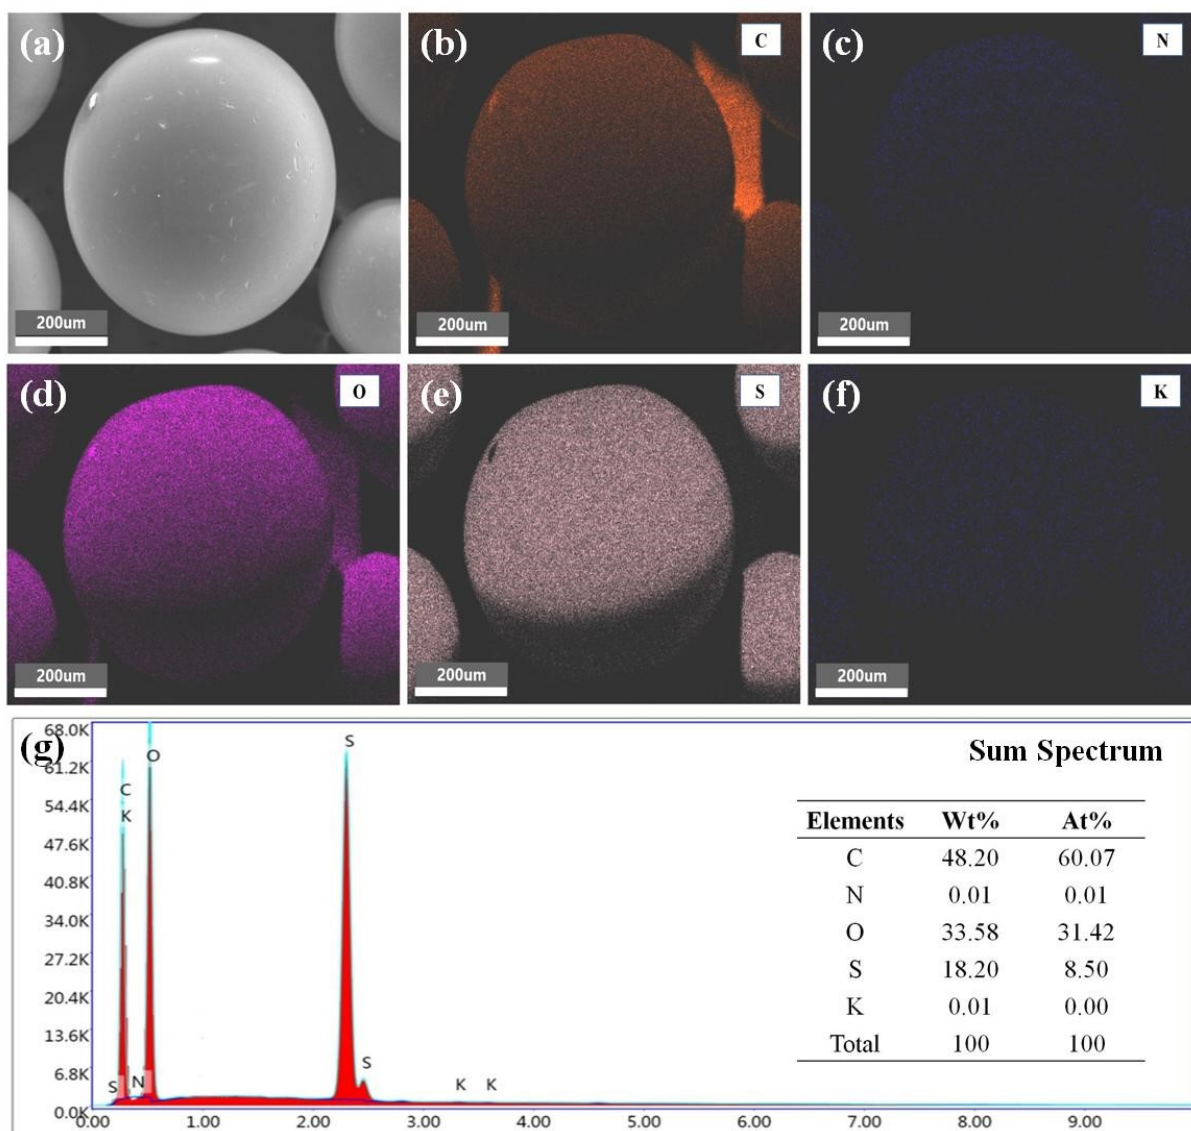

**Fig. S4** SEM-EDS scanning results of C160H resin before adsorption: (a)SEM images, (b-f) EDS maps for elemental distribution, and (g) elemental composition spectrum



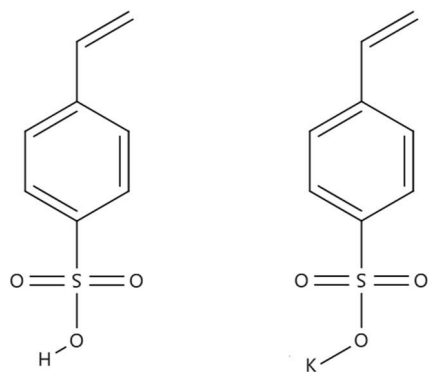

$\Delta E_{\text{binding}}$  321.24 kcal·mol<sup>-1</sup>      5.43 kcal·mol<sup>-1</sup>

**Fig. S5** Binding energy between H<sup>+</sup> / K<sup>+</sup> and ligand

**Table S1** Physical and chemical properties of Purolite C160 ion exchange resin

| Property           | Description                          |
|--------------------|--------------------------------------|
| Structure          | Macroporous                          |
| Matrix             | Polystyrene / divinylbenzene         |
| Functional group   | Sulfonic Acid                        |
| Ionic form         | Na <sup>+</sup>                      |
| Bead size          | 0.3-1.2 mm                           |
| Specific gravity   | 1.3 g/mL (in Na <sup>+</sup> form)   |
| Moisture retention | 35%-40% (in Na <sup>+</sup> form)    |
| Total capacity     | 2.3 meq/mL (in Na <sup>+</sup> form) |

## References

1. G. J. Millar, S. J. Couperthwaite and C. W. Leung, *Separation and Purification Technology*, 2015, **141**, 366-377.
2. F. Moghimi, A. H. Jafari, H. Yoozbashizadeh and M. Askari, *Transactions of Nonferrous Metals Society of China*, 2020, **30**, 236-248.
3. K. Wang, K. Chen, L. Xiang, M. Zeng, Y. Liu and Y. Liu, *Separation and Purification Technology*, 2022, **292**, 121044.
4. J. H. Vinco, A. B. Botelho Junior, H. A. Duarte, D. C. R. Espinosa and J. A. S. TenÓRio, *Transactions of Nonferrous Metals Society of China*, 2022, **32**, 2438-2450.
5. Z.X. Xuan, T.T. Yan, Z.J. Zhang and F. Luo, *Journal of Molecular Science*, 2020, **36**, 145-152.
